# Supplementary material for: The PorX/PorY system is a virulence factor of Porphyromonas gingivalis and mediates the activation of the type IX secretion system
Source: PubMed Central journal article supplement (PMC8050853; doi:10.1016/j.jbc.2021.100574), 2021-03-21
Supplement: mmc1.pdf [file mmc1.pdf]

**The PorX/PorY system is a virulence factor of *Porphyromonas gingivalis* and mediates the activation of the Type IX secretion system**

Dezhi Yang<sup>1,2</sup>, Chizhou Jiang<sup>1,2</sup>, Bo Ning<sup>3</sup>, Wei Kong<sup>2\*</sup>, and Yixin Shi<sup>1,2\*</sup>

<sup>1</sup>The School of Life Sciences, and <sup>2</sup>Biodesign Center for Immunotherapy, Vaccines and Virotherapy, Arizona State University, 85287-4501, <sup>3</sup>The Center for Cellular and Molecular Diagnostics, Tulane University School of Medicine, 70112

\*Correspondence should be addressed to:  
Wei Kong, [wei.kong@asu.edu](mailto:wei.kong@asu.edu) or Yixin Shi, [yixin.shi@asu.edu](mailto:yixin.shi@asu.edu)

Running Title: Gene regulation of the PorX/PorY system in *P. gingivalis*

This file includes:  
Figure S1 to S3

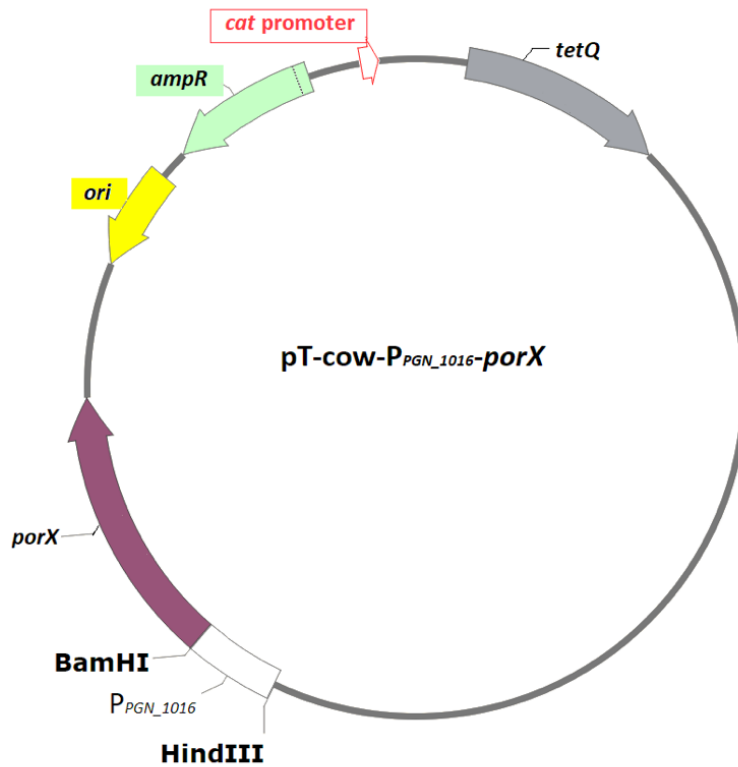

**Fig. S1**

**Fig. S1. Map of the *porX* complementation plasmid.** The plasmid pT-COW- $P_{PGN_{1016}}$ -*porX* contained a wild-type copy of the *porX* coding region (marked as the *purple curved arrow*). Transcription of this gene was initiated by a promoter located upstream of the *PGN\_1016* gene. Both *PGN\_1016* and *porX* genes were predicted to be members of an operon on *P. gingivalis* genomes.

**A***porX* coding region: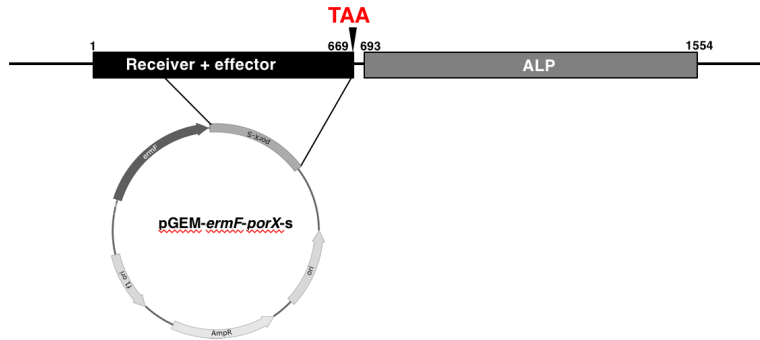**B**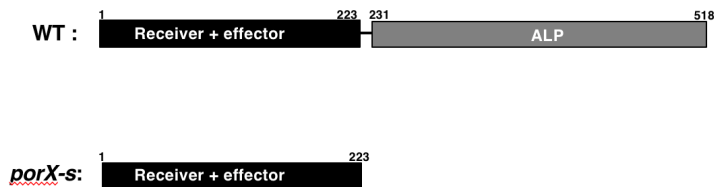**Fig. S2****F**

**Fig. S2. Schematic representatives of the strategy to construct the *porX-s* strain.** (A) The *porX* coding region. The *black box* represents the DNA region encoding the first 223 amino acid residues with receiver + DNA-binding regions, and the *grey box* represents the DNA region encoding the ALP region. Suicide plasmid pGEM-*ermF-porX-s* was inserted into the *porX* coding region to introduce a TAA stop codon between the 669<sup>th</sup>-670<sup>th</sup> nucleotides of the *porX* coding sequence (indicated by an *arrowhead*). *Numbering* represents the nucleotides of the coding sequence. (B) Structures of the PorX proteins. The full-length wild-type PorX protein (*upper*) and truncated PorX-s protein (*bottom*). The first 223 amino acid residues (*black box*) represent receiver + DNA-binding regions shared by both WT PorX and PorX-s proteins. The ALP sequence (*grey box*) was deleted in PorX-s protein. *Numbering* represents codon position.

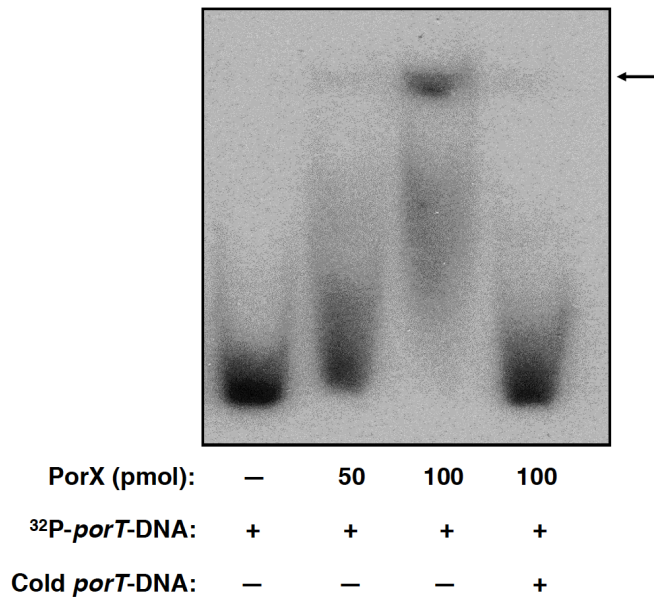

**Fig. S3**

**Fig. S2. The PorX response regulator binds to the *porT* promoter region.** EMSA analysis for binding of PorX to the *porT* promoter. <sup>32</sup>P-labeled *porT* DNA fragment was incubated with PorX-c-His<sub>6</sub> protein at the indicated amount. The 4th lane is the same as the 3rd lane but supplemented with non-labeled (cold) *sigP* DNA fragment. The PorX/DNA mixtures were subjected to 5% PAGE. Location of DNA migration was detected by autoradiography. *Arrow* indicates the shifted bands after DNA fragments were associated with the PorX-His<sub>6</sub> protein.
